# Supplementary material for: Colourimetric Plate Assays Based on Functionalized Gelatine Hydrogel Useful for Various Screening Purposes in Enzymology
Source: MDPI journal article supplement (doi:10.3390/ijms24010033), 2022-12-20
Supplement: s1 [file s1]

## SUPPORTING MATERIALS

# Colourimetric plate assays based on functionalized gelatine hydrogels useful for various screening purposes in enzymology

Karolina Labus \* and Halina Maniak

Department of Micro, Nano and Bioprocess Engineering, Faculty of Chemistry, Wrocław University of Science and Technology, Wybrzeże Wyspiańskiego 27, Wrocław 50-370, Poland (

\* Correspondence:

Tel.: +48-71-320-3314; fax: +48-71-328-1318// e-mail: [karolina.labus@pwr.edu.pl](mailto:karolina.labus@pwr.edu.pl) (K.L.);

### 1. Conditions of *Cerrena unicolor* cultivation

A white-rot fungus *Cerrena unicolor* (Bull.ex.Fr.) Murr, strain no. 139 originated from the culture collection of the Department of Biochemistry, University of Lublin (Poland). The stock culture was maintained on potato dextrose agar at 4°C and periodically transferred to a fresh medium. The fungus cultivation and laccase production were performed according to [1] with changes. The culture medium (CM) included: glucose 12 g, L-asparagine 2.5 g, D,L-phenylalanine 0.15 g, adenine 0.027 g, KH<sub>2</sub>PO<sub>4</sub> 1.0 g, Na<sub>2</sub>HPO<sub>4</sub>×12H<sub>2</sub>O 0.1 g, MgSO<sub>4</sub>×7H<sub>2</sub>O 0.5 g, and 10 mL of microelements' solution: CaCl<sub>2</sub> 0.01 g, FeSO<sub>4</sub>×7H<sub>2</sub>O 0.01 g, MnSO<sub>4</sub>×4H<sub>2</sub>O 0.001 g, ZnCl<sub>2</sub> 0.001 g, CuSO<sub>4</sub>×5H<sub>2</sub>O 0.002 g, and thiamine 50 µg, then the solution was replenished with distilled water up to 1 L. After sterilisation, the pH of the medium was 5.2. An inoculum of *C. unicolor* was prepared by harvesting mycelium with an inoculation loop from a six-day culture and directly transferring it to a 500 mL flask containing 100 mL of sterile CM. The microorganism pre-grew for 6 days on a rotary shaker (120 rpm) at a constant temperature of 24 °C. Consequently, a portion of 20 colonies of the *C. unicolor* with an average dry mass of 20±1.0 mg was transferred into 250 mL flasks containing 50 mL of sterile CM. The *C. unicolor* culture was growing for 16 days with a similar agitation and temperature regime. On the fourth day, fungal culture was induced with pyrogallol dissolved in methanol at a final concentration of 10 µM [2]. The concentration of alcohol in the culture medium was 0.4% (v/v). Changes in pH, substrate, biomass, protein concentration and laccase activity were determined by analysing the cultivation medium in a single flask corresponding to one day of cultivation.

### 2. Determination of bioprocess parameters

The yield factors for the applied growth conditions were calculated based on the following formulas:

$$Y_{X/S} = \frac{X_t - X_0}{S_0 - S_t} \quad (S1)$$

$$Y_{P/S} = \frac{P_t - P_0}{S_0 - S_t} \quad (S2)$$

Where,  $Y_{X/S}$  (S1) stands for the yield coefficient of fungal biomass and  $Y_{P/S}$  (S2) stands for the yield coefficient of the product (protein); X, S, and P correspond to the masses of biomass, substrate and protein (product), respectively; the symbols t and 0 in the subscript stand for the cultivation time, for which the masses of biomass, glucose and protein were used for calculations. A specific growth rate is determined from the logarithmic growth phase of a microorganism by plotting the relationship  $\ln X = f(t)$ .

### 3. Description of the *Cerrena unicolor* culture

The results of *Cerrena unicolor* cultivation are presented in **Table S1** (data correspond to **Figure 6** in the article). The monitoring of changes in biomass (X), glucose (S), product (P, protein), laccase activity (U/mg) and pH was carried out for 16 days. To avoid discrepancies due to water evaporation during the

experiment, the values of X, S, and P were expressed in units of mass [g]. The fungus was cultivated in batch mode, starting from 0.67 g (12 g/L) of glucose content. Complete depletion of the carbon substrate occurred within six days with a steady increase biomass and protein to 0.23 g (5.4 g/L) and 0.20 g (4.7 g/L), respectively. Yield factors calculated for time from 0 (beginning of the process) and day 6 were found  $Y_{X/S} = 0.42$  and  $Y_{P/S} = 0.39$ . Furthermore, the specific growth rate  $\mu$  [1/day], was determined as 0.71 day<sup>-1</sup> at an average glucose concentration of 9.8 g/L and determined for a period of 1-3 days of the culture. Under the conditions described, the culture medium maintained the pH value at 5.3-6.4 between days 1 and 5 and increased to a slightly alkaline pH of 8.1 to 8.7 for up to the end of the experiment. Analysis of the course of laccase-specific activity showed that there were two peaks of maximum activity in the culture between days 6 and 8 and on day 11.

**Table S1.** The results of fungal biomass, pH, glucose, protein and laccase-specific activity measurements in *Cerrena unicolor* cultivation in the medium with glucose as the sole carbon source.

| Time  | Biomass (X) | pH   | Glucose (S) | Protein (P) | Specific activity        |
|-------|-------------|------|-------------|-------------|--------------------------|
| [day] | [g]         | [-]  | [g]         | [g]         | [U/mg·10 <sup>-1</sup> ] |
| 0     | 0.000       | 5.27 | 0.666       | 0.090       | 0.000                    |
| 1     | 0.026       | 5.27 | 0.599       | 0.092       | 0.000                    |
| 2     | 0.065       | 5.67 | 0.553       | 0.125       | 0.005                    |
| 3     | 0.096       | 5.99 | 0.393       | 0.145       | 0.005                    |
| 4     | 0.130       | 6.39 | 0.178       | 0.125       | 0.057                    |
| 5     | 0.190       | 5.86 | 0.124       | 0.129       | 0.144                    |
| 6     | 0.226       | 8.07 | 0           | 0.198       | 0.484                    |
| 7     | 0.206       | 8.3  | 0           | 0.218       | —nd                      |
| 8     | 0.190       | 8.76 | 0           | 0.222       | 0.487                    |
| 9     | 0.185       | 8.66 | 0           | 0.239       | 0.358                    |
| 10    | 0.165       | 8.61 | 0           | 0.247       | 0.304                    |
| 11    | 0.177       | 8.38 | 0           | 0.237       | 0.398                    |
| 12    | 0.177       | 8.88 | 0           | 0.257       | —nd                      |
| 14    | 0.166       | 8.81 | 0           | 0.276       | 0.340                    |
| 16    | 0.161       | 8.69 | 0           | 0.299       | 0.289                    |

—nd – not determined

#### 4. Description of gelatine hydrogel cross-linked with microbial transglutaminase (mTGase)

Gelatine hydrogel used in our study was prepared according to the procedure described in detail in the article subsection no. 3.2.1. As a result of cross-linking with mTGase, durable three-dimensional material was obtained. In order to use a hydrogel matrix enriched with active compounds for the preparation of a colorimetric test kit, just after mixing the gelatine solution with TGase, the resulting mixture was placed in a 96-well plate in the amount of 200  $\mu$ L to each well. In this way, a transparent support was obtained for simultaneous multi-sample screening (**Figure S1**).

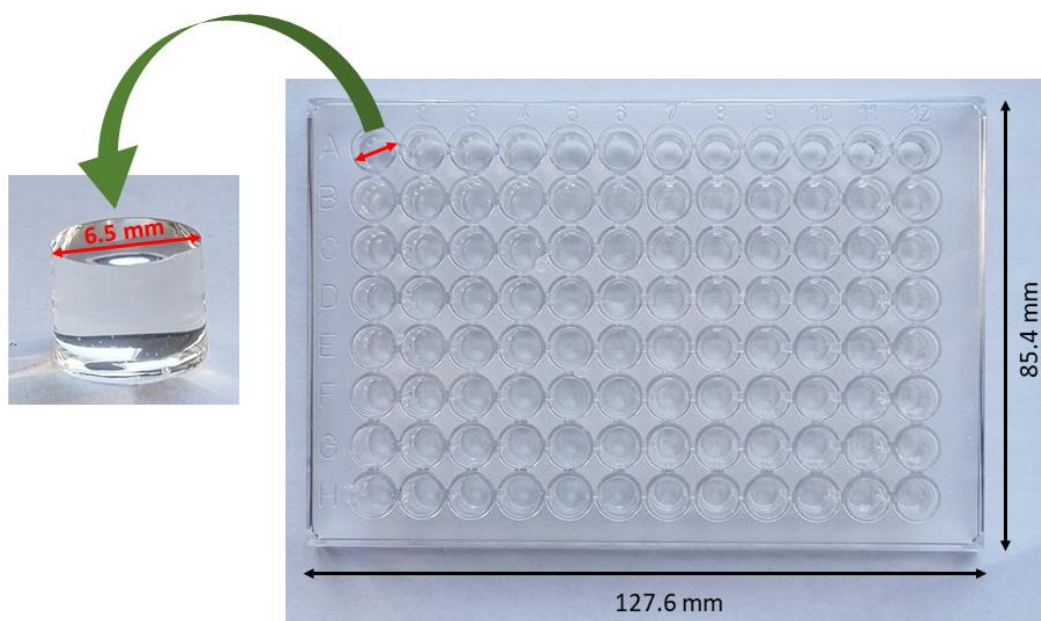

**Figure S1.** Gelatine hydrogel used for development of colourimetric test for various screening purposes in enzymology (left) and the 96-well plate used (right).

## 5. References

1. Fahraeus, G.; Reinhammar, B. Large scale production and purification of laccase from cultures of the fungus *Polyporus versicolor* and some properties of laccase A. *Acta Chem. Scand.* **1967**, *21*, 2367–2378.
2. Al-adhami, A.J.H.; Bryjak, J.; Greb-Markiewicz, B.; Peczyńska-Czoch, W. Immobilization of wood-rotting fungi laccases on modified cellulose and acrylic carriers. *Process Biochem.* **2002**, *37*, 1387–1394.
